# Supplementary material for: Effects of dietary supplementation with Astragalus Polysaccharides on growth performance and rumen microbial function in yak
Source: Research Square preprint supplement (doi:10.21203/rs.3.rs-7751279/v1), 2025-10-23
Supplement: Supplementary file 1 [file 7ccbc2ce5fb582d262dd62db.docx]

**Table S2. Sequencing Data Statistics Results**

| Sample | RawReads | CleanReads | CleanReads (%) | GC (%) | Q20 (%) | Q30 (%) |
| --- | --- | --- | --- | --- | --- | --- |
| CG1 | 78648952 | 78620522 | 99.96% | 45.54% | 98.94% | 96.61% |
| CG2 | 81663040 | 81637794 | 99.97% | 45.85% | 98.95% | 96.52% |
| CG3 | 76690978 | 76657368 | 99.96% | 44.66% | 98.91% | 96.50% |
| CG4 | 79726594 | 79695636 | 99.96% | 45.50% | 98.98% | 96.63% |
| CG5 | 82099150 | 82066848 | 99.96% | 45.58% | 98.91% | 96.49% |
| AG1 | 80207970 | 80167732 | 99.95% | 40.74% | 98.86% | 96.39% |
| AG2 | 77453834 | 77416284 | 99.95% | 44.78% | 99.00% | 96.80% |
| AG3 | 79034520 | 79007292 | 99.97% | 43.23% | 98.89% | 96.40% |
| AG4 | 79476730 | 79435846 | 99.95% | 49.42% | 98.87% | 96.45% |
| AG5 | 79513494 | 79476978 | 99.95% | 43.57% | 98.86% | 96.35% |

Q20 (%): the percentage of bases with a base recognition accuracy of more than 99%;

Q30 (%): the percentage of bases with a base recognition accuracy of more than 99.9%.

**Detailed information on contigs in each sample**

| Sample | Total_Size(bp) | Contigs_Num | Mean_Len | Max_Len | Min_Len | GC (%) | N50 | N90 |
| --- | --- | --- | --- | --- | --- | --- | --- | --- |
| CG1 | 398513567 | 316471 | 1259.241975 | 436947 | 500 | 45.70% | 1399 | 581 |
| CG2 | 412642755 | 262837 | 1569.956874 | 555083 | 500 | 45.30% | 2246 | 619 |
| CG3 | 418000251 | 291087 | 1435.99766 | 616990 | 500 | 44.68% | 1851 | 600 |
| CG4 | 479951069 | 353876 | 1356.269058 | 476154 | 500 | 45.51% | 1614 | 593 |
| CG5 | 489879157 | 361862 | 1353.773419 | 632723 | 500 | 45.60% | 1612 | 593 |
| AG1 | 688828670 | 552572 | 1246.586273 | 446999 | 500 | 39.93% | 1381 | 590 |
| AG2 | 615403695 | 449366 | 1369.49323 | 414078 | 500 | 45.10% | 1663 | 593 |
| AG3 | 575290041 | 394022 | 1460.045482 | 323344 | 500 | 44.43% | 1939 | 603 |
| AG4 | 614983467 | 453729 | 1355.398194 | 345717 | 500 | 49.54% | 1657 | 592 |
| AG5 | 745641847 | 608306 | 1225.767701 | 419106 | 500 | 43.61% | 1333 | 581 |

N50: the number of contigs longer than N50 accounts for 50% of the total;

N90: the number of contigs longer than N90 accounts for 90% of the total.

**ORF prediction**

| Sample | Total_Size | ORF_Num | Mean_Len | Max_Len | Min_Len | GC (%) |
| --- | --- | --- | --- | --- | --- | --- |
| C1 | 348969528 | 502914 | 693.8950357 | 27876 | 201 | 46.71% |
| C2 | 364668594 | 472189 | 772.2937087 | 55170 | 201 | 46.30% |
| C3 | 370954605 | 495828 | 748.1517885 | 21180 | 201 | 45.56% |
| C4 | 423967452 | 581265 | 729.3875461 | 25989 | 201 | 46.49% |
| C5 | 432926253 | 594356 | 728.3955289 | 27876 | 201 | 46.58% |
| A1 | 609715767 | 804733 | 757.6622 | 30585 | 201 | 40.75% |
| A2 | 546847572 | 741644 | 737.3451 | 21756 | 201 | 46.00% |
| A3 | 504125871 | 705275 | 714.7933 | 32586 | 201 | 45.46% |
| A4 | 547527075 | 750375 | 729.6713 | 32586 | 201 | 50.61% |
| A5 | 660264165 | 926429 | 712.6981 | 32586 | 201 | 44.49% |
