# Supplementary material for: Effects of dietary supplementation with Astragalus Polysaccharides on growth performance and rumen microbial function in yak
Source: Research Square preprint supplement (doi:10.21203/rs.3.rs-7751279/v1), 2025-10-23
Supplement: Supplementary file 2 [file adde1901cbb6a2b34f654c12.docx]

**Table S1. Dietary feed composition list (dry matter basis)**

| Raw material name | Protein specification % | Content % | Protein level % |
| --- | --- | --- | --- |
| Corn | 8.00 | 58.75 | 4.70 |
| Spouting corn bran | 18.00 | 6.00 | 1.08 |
| Molasses | - | 3.00 | 0.00 |
| 46 Cottonseed meal | 45.67 | 12.00 | 5.48 |
| 43 Bean meal | 42.98 | 12.90 | 5.54 |
| Feed grade magnesium oxide | - | 0.20 | 0.00 |
| Calcium hydrogen phosphate | - | 0.80 | 0.00 |
| Sodium bicarbonate | - | 0.60 | 0.00 |
| Feed grade sodium chloride | - | 1.20 | 0.00 |
| Fine ground limestone | - | 1.50 | 0.00 |
| Ruminant Flavor 161K | - | 0.02 | 0.00 |
| 1 % premix feed | - | 1.00 | 0.00 |
| Acetohydroxamic acid | - | 0.02 | 0.00 |
| Deodorant | - | 0.01 | 0.00 |
| Dried vinasse | 13.76 | 2.00 | 0.28 |
| Footing |  | 100 | 16.8 |

Note: All data in the table are estimates.

The nutritional content of each kilogram of feed premix is as follows: Vitamin A (VA) 3500 international units (IU), Vitamin D (VD) 1000 international units (IU), Vitamin E (VE) 40 international units (IU), Manganese (Mn) 40 mg (mg), iron (Fe) 50 mg (mg), copper (Cu) 10 mg (mg), zinc (Zn) 40 mg (mg), Selenium (Se) 0.3 mg (mg).

**Nutrient composition of diet**

| Nutritional component | Dry matter basis | Feeding basis |
| --- | --- | --- |
| DM（%） | 100.00 | 88.54 |
| Roughage（%） | 0.00 | 0.00 |
| CP（%） | 19.33 | 17.12 |
| Rumen bypass protein（%） | 14.69 | 14.69 |
| Rumen degradable protein（%） | 16.49 | 14.60 |
| Soluble protein（%） | 18.93 | 18.93 |
| Metabolizable energy（MJ/kg） | 12.66 | 11.21 |
| NEL（MJ/kg） | 8.16 | 7.22 |
| Maintenance net energy（MJ/kg） | 8.16 | 7.22 |
| Net energy gain（MJ/kg） | 5.83 | 5.16 |
| Acid detergent fiber | 9.55 | 8.46 |
| Neutral detergent fiber | 18.90 | 16.74 |
| Crude feed | 0.00 | 0.00 |
| Effective neutral detergent fiber | 5.74 | 5.08 |
| Non-fiber carbohydrate | 52.85 | 46.79 |
| Silage acid | 0.23 | 0.21 |
| Soluble sugar | 6.72 | 5.95 |
| Starch | 40.86 | 36.18 |
| Soluble fiber | 5.03 | 4.45 |
| Total crude fat | 2.72 | 2.41 |
| Long chain fatty acid | 2.65 | 2.34 |
| Crude ash | 9.29 | 8.22 |
| Ca | 0.95 | 0.84 |
| P | 0.65 | 0.57 |
| Mg | 0.36 | 0.32 |
| K | 0.96 | 0.85 |
| S | 0.24 | 0.21 |
| Na | 0.84 | 0.74 |
| Cl | 0.94 | 0.83 |
| Lignin lignose | 1.43 | 1.27 |

Note: All data in the table are estimates.
